# Supplementary material for: Synergistic PA and HA mutations confer mouse adaptation of a contemporary A/H3N2 influenza virus
Source: PubMed Central journal article supplement (PMC6851088; doi:10.1038/s41598-019-51877-4), 2019-11-12
Supplement: 41598_2019_51877_MOESM1_ESM.pdf [file 41598_2019_51877_MOESM1_ESM.pdf]

**Synergistic PA and HA mutations confer mouse adaptation of a contemporary A/H3N2 influenza virus**

Mariana Baz<sup>#\*1</sup>, Zeineb M'hamdi<sup>\*1</sup>, Julie Carbonneau<sup>1</sup>, Sophie Lavigne<sup>2</sup>, Christian Couture<sup>2</sup>, Yacine Abed<sup>1</sup> and Guy Boivin<sup>#1</sup>

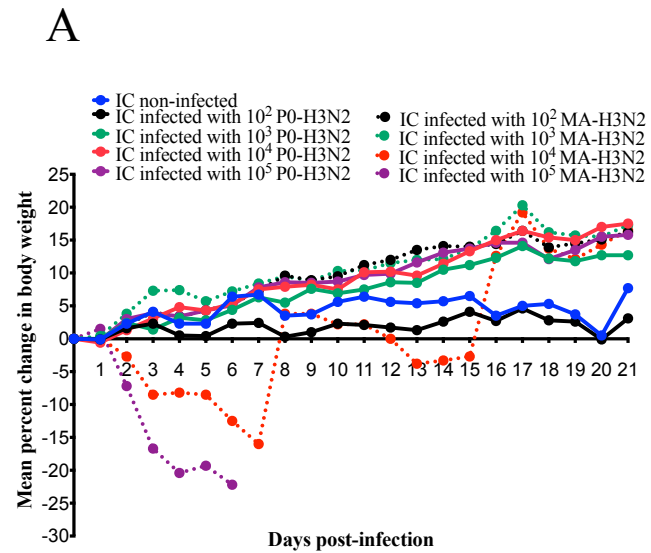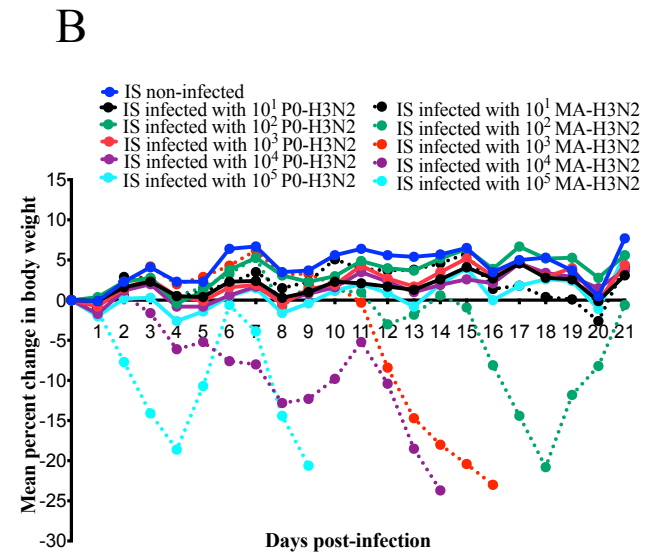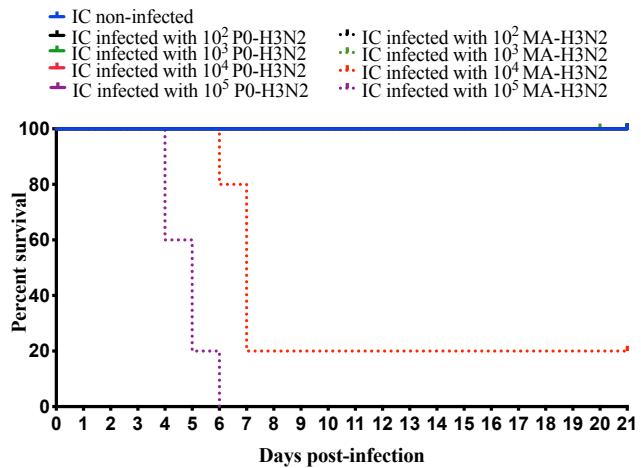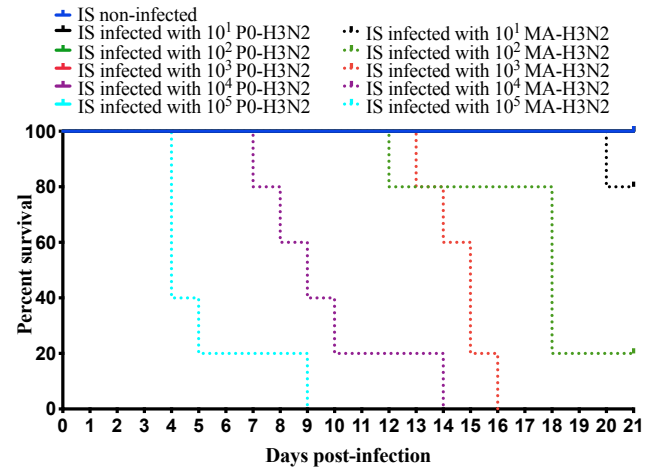

### Supplementary figure

Virulence of P0-H3N2 and MA-H3N2 viruses in IC and IS mice. **(A)** Body weight loss and survival curve of IC mice inoculated with  $10^2$  to  $10^5$  PFU/50  $\mu$ l of P0-H3N2 or MA-H3N2 viruses. **(B)** Body weight loss and survival curve of IS mice inoculated with  $10^1$  to  $10^5$  PFU/50  $\mu$ l of P0-H3N2 or MA-H3N2 viruses. Mice were observed daily for 21 days for clinical signs of illness, including weight loss, ruffled fur, and hunching and were sacrificed if they lost  $\geq 20\%$  of their original body weight.
